# Supplementary material for: Nano copper oxide catalyzed synthesis of symmetrical diaryl sulfides under ligand free conditions
Source: publisher site journal article supplement (doi:10.3762/bjoc.7.101), 2011-06-30

# Supporting Information

for

## Nano copper oxide catalyzed synthesis of symmetrical diaryl sulfides under ligand free conditions

K. Harsha Vardhan Reddy, V. Prakash Reddy, A. Ashwan Kumar, G. Kranthi and Y.V.D. Nageswar\*

Address: Organic Chemistry Divison-I, Indian Institute of Chemical Technology, Hyderabad-500 607, India

Email: Y.V.D. Nageswar\* - [dryvdnageswar@gmail.com](mailto:dryvdnageswar@gmail.com)

\* Corresponding author

### Experimental details and spectroscopic data for new compounds

#### Contents:

|                                                                    |    |
|--------------------------------------------------------------------|----|
| General information                                                | S2 |
| General procedure for the synthesis of symmetrical diaryl sulfides | S2 |
| Spectroscopic data                                                 | S3 |
| References                                                         | S7 |
| Copies of $^1\text{H}$ NMR and $^{13}\text{C}$ NMR of compounds    | S8 |

## **General information:**

CuO nanoparticles (mean particle size 33 nm, surface area, 29 m<sup>2</sup>/g and purity, 99.99%) were purchased from Sigma Aldrich. Analytical thin layer chromatography (TLC) was carried out using silica gel 60 F<sub>254</sub> pre-coated glass plates. Visualization was accomplished with a UV lamp and I<sub>2</sub> stain. All products were characterized by NMR and MS. <sup>1</sup>H and <sup>13</sup>C NMR was recorded on 100, 200 and 300 MHz spectrometers, in CDCl<sub>3</sub> with TMS as the internal standard, chemical shifts are reported in parts per million (ppm, δ) downfield from tetramethylsilane.

## **General procedure for synthesis of symmetrical diaryl sulfides:**

A mixture of the aryl iodide (2.0 mmol), potassium thiocyanate (1.5 mmol), nano CuO (5.0 mol %), and KOH (2.0 equiv) was stirred at 130 °C under a N<sub>2</sub> atmosphere in DMSO (2.0 mL). The progress of the reaction was monitored by TLC. When the reaction was complete, the reaction mixture was allowed to cool, a 1:1 mixture ethyl acetate and water (20 mL) was added, and CuO was removed by centrifugation. The organic layer was washed successively with brine and water, and dried with Na<sub>2</sub>SO<sub>4</sub>. The solvent and volatiles were completely removed under vacuum to give the crude product, which was purified by column chromatography on silica gel to give the analytically pure diaryl sulfide (94%).

## **Recycling of the catalyst:**

After the reaction was complete, the reaction mixture was allowed to cool, a 1:1 mixture of ethyl acetate/water (2.0 mL) was added, and CuO was removed by centrifugation. After each cycle, the catalyst was recovered by simple centrifugation, washed with deionized water and ethyl acetate, and then dried in vacuo. The recovered nano-CuO was used directly in the next cycle.

### Spectroscopic data:

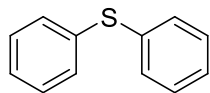

#### Diphenylsulfane (Table 3, entry 1) [1]:

Colorless oil

$^1\text{H NMR}$  (300 MHz,  $\text{CDCl}_3$ , TMS):  $\delta = 7.32\text{--}7.16$  (m, 10H).

$^{13}\text{C NMR}$  (75 MHz,  $\text{CDCl}_3$ , TMS):  $\delta = 135.7, 131.0, 129.1, 127.0$ .

Mass (EI):  $m/z$  186  $[\text{M}]^+$

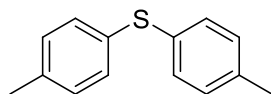

#### Di-p-tolylsulfane (Table 3, entry 4) [1]:

Yellow oil

$^1\text{H NMR}$  (200 MHz,  $\text{CDCl}_3$ , TMS):  $\delta = 7.21$  (d, 4H,  $J = 8.01$  Hz),  $7.06$  (d, 4H,  $J = 8.00$  Hz),  $2.32$  (s, 6H).

$^{13}\text{C NMR}$  (50 MHz,  $\text{CDCl}_3$ , TMS):  $\delta = 136.7, 132.81, 131.0, 129.8, 96.1$ .

Mass (EI):  $m/z$  214  $[\text{M}]^+$

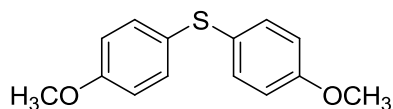

#### Bis(4-methoxyphenyl)sulfane (Table 3, entry 6) [1]:

Colorless oil

$^1\text{H NMR}$  (300 MHz,  $\text{CDCl}_3$ , TMS):  $\delta = 7.50\text{--}7.22$  (m, 4H),  $6.82$  (d, 4H,  $J = 8.60$  Hz),  $3.74$  (s, 6H).

$^{13}\text{C NMR}$  (75 MHz,  $\text{CDCl}_3$ , TMS):  $\delta = 158.9, 132.6, 114.6, 114.5, 55.2$ .

Mass (EI):  $m/z$  246  $[\text{M}]^+$

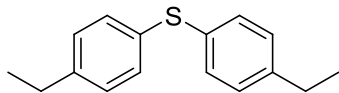

**Bis(4-ethylphenyl)sulfane (Table 3, entry 8):**

Colorless oil

**IR** (neat):  $\nu = 2962.71, 2924.56, 2858.78, 1488.79, 1455.90, 1403.36, 822.82\text{cm}^{-1}$

**$^1\text{H NMR}$**  (300 MHz,  $\text{CDCl}_3$ , TMS):  $\delta = 7.21(\text{d}, 4\text{H}, J = 7.80 \text{ Hz}), 7.07(\text{d}, 4\text{H}, J = 7.81 \text{ Hz}), 2.62\text{--}2.52 (\text{m}, 4\text{H}), 1.26 (\text{t}, 6\text{H}, J = 7.80 \text{ Hz})$ .

**$^{13}\text{C NMR}$**  (75 MHz,  $\text{CDCl}_3$ , TMS):  $\delta = 143.1, 132.7, 131.0, 128.6, 28.3, 15.4$ .

**Mass** (EI):  $m/z$  242  $[\text{M}]^+$

**Anal. calcd for:** ( $\text{C}_{18}\text{H}_{18}\text{S}$ ) C, 79.29; H, 7.49; S, 13.23.

**Found:** C, 79.22; H, 7.42; S, 13.19.

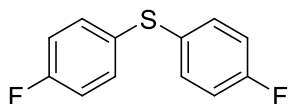

**Bis(4-fluorophenyl)sulfane (Table 3, entry 9):**

Colorless oil

**$^1\text{H NMR}$**  (300 MHz,  $\text{CDCl}_3$ , TMS):  $\delta = 7.31\text{--}7.24 (\text{m}, 2\text{H}), 7.12\text{--}7.09 (\text{m}, 2\text{H}), 7.03\text{--}6.89 (\text{m}, 4\text{H})$ .

**$^{13}\text{C NMR}$**  (300 MHz,  $\text{CDCl}_3$ , TMS):  $\delta = 165.4, 160.4, 137.0, 130.6, 126.7, 118.1, 117.6, 114.7, 114.3$ .

**Mass** (EI):  $m/z$  222  $[\text{M}]^+$

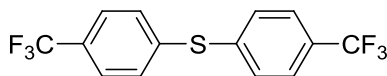

**Bis(4-(trifluoromethyl)phenyl)sulfane (Table 3, entry 10):**

Colorless oil

**IR** (neat):  $\nu = 2925.01, 1586.43, 1471.85, 1217.41, 879.81, 777.01, 679.82\text{cm}^{-1}$

**$^1\text{H}$  NMR** (300 MHz,  $\text{CDCl}_3$ , TMS):  $\delta = 7.80\text{--}7.34(\text{m}, 8\text{H})$ .

**$^{13}\text{C}$  NMR** (75 MHz,  $\text{CDCl}_3$ , TMS):  $\delta = 140.9, 136.4, 134.2, 129.8, 127.8, 124.4, 121.8$ .

**Mass** (EI):  $m/z$  322  $[\text{M}]^+$

**Anal. calcd for:** ( $\text{C}_{14}\text{H}_8\text{F}_6\text{S}$ ) C, 52.18; H, 2.50; S, 9.95.

**Found:** C, 52.16; H, 2.47; S, 9.93.

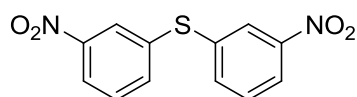

**Bis(3-nitrophenyl)sulfane (Table 3, entry 11 ):**

Pale yellow oil

**IR** (neat):  $\nu = 2922.71, 2857.70, 1523.17, 1344.41, 875.13, 730.92\text{cm}^{-1}$

**$^1\text{H}$  NMR** (300 MHz,  $\text{CDCl}_3$ , TMS):  $\delta = 8.19\text{--}8.15$  (m, 4H), 7.65 (d, 2H,  $J = 8.31$  Hz), 7.55 (t, 2H,  $J = 8.30$  Hz).

**$^{13}\text{C}$  NMR** (75 MHz,  $\text{CDCl}_3$ , TMS):  $\delta = 148.8, 136.7, 130.7, 125.6, 122.7$ .

**Mass** (EI):  $m/z$  276  $[\text{M}]^+$

**Anal. calcd for:** ( $\text{C}_{12}\text{H}_8\text{N}_2\text{O}_4\text{S}$ ) C, 52.17; H, 2.92; S, 11.61; N, 10.14.

**Found:** C, 52.12; H, 2.90; S, 11.58; N, 10.11.

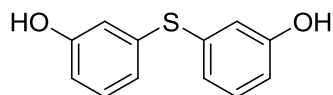

**Bis(3-hydroxyphenyl)sulfane (Table 3, entry 12):**

Colorless oil

**$^1\text{H}$  NMR** (300 MHz,  $\text{CDCl}_3$ , TMS):  $\delta = 7.32\text{--}7.13$  (m, 2H), 6.97–6.70 (m, 6H), 5.51 (bs, 2H)

**$^{13}\text{C}$  NMR** (75 MHz,  $\text{CDCl}_3$ , TMS):  $\delta = 156.0, 136.7, 130.2, 128.3, 123.4, 117.6, 114.3$ .

**Mass** (EI):  $m/z$  218  $[\text{M}]^+$

**Anal. calcd for:** (C<sub>12</sub>H<sub>10</sub>O<sub>2</sub>S) C, 66.03; H, 4.62; S, 14.69.

**Found:** C, 66.01; H, 4.60; S, 14.64.

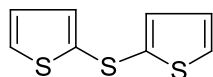

**Dithiophen-2-ylsulfane (Table 3, entry 13):**

Colorless oil

**<sup>1</sup>H NMR** (300 MHz, CDCl<sub>3</sub>, TMS): δ = 7.63–7.53 (m, 1H), 7.45–7.34 (m, 2H), 7.27–7.11 (m, 3H).

**Mass (EI):** *m/z* 197 [M]<sup>+</sup>

**Anal. calcd for:** (C<sub>8</sub>H<sub>6</sub>S<sub>3</sub>) C, 48.45; H, 3.05; S, 48.50.

**Found:** C, 48.42; H, 2.99; S, 48.47.

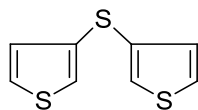

**Dithiophen-3-ylsulfane (Table 3, entry 14):**

Yellow oil

**IR** (neat): ν = 2921.94, 1638.07, 1467.60, 1398.86, 839.79, 699.98 cm<sup>-1</sup>

**<sup>1</sup>H NMR** (300 MHz, CDCl<sub>3</sub>, TMS): δ = 7.31–7.25 (m, 2H), 7.17–7.11 (m, 2H), 6.96–6.94 (m, 2H).

**<sup>13</sup>C NMR** (75 MHz, CDCl<sub>3</sub>, TMS): δ = 129.6, 126.4, 124.7.

**Mass (EI):** *m/z* 197 [M]<sup>+</sup>

**Anal. calcd for:** (C<sub>8</sub>H<sub>6</sub>S) C, 48.45; H, 3.05; S, 48.50.

**Found:** C, 48.42; H, 3.02; S, 48.47.

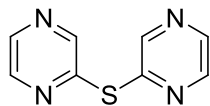

**Dipyrizin-2-ylsulfane (Table 3, entry 15):**

Colorless solid

M. P. : 90 °C

**IR** (neat):  $\nu = 2923.46, 1454.73, 1387.00, 1119.88, 1007.66, 834.25\text{cm}^{-1}$

**$^1\text{H NMR}$**  (300 MHz,  $\text{CDCl}_3$ , TMS):  $\delta = 8.70\text{--}8.66$  (m, 2H),  $8.46\text{--}8.40$  (m, 4H).

**$^{13}\text{C NMR}$**  (75 MHz,  $\text{CDCl}_3$ , TMS):  $\delta = 146.68, 144.67, 142.61$ .

**Mass** (EI):  $m/z$  190  $[\text{M}]^+$

**Anal. calcd for:** ( $\text{C}_8\text{H}_6\text{N}_4\text{S}$ ) C, 50.51; H, 3.18; S, 16.86.

**Found:** C, 50.50; H, 3.16; S, 16.85.

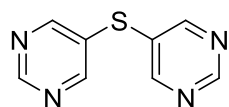

**Dipyrimidin-5-ylsulfane (Table 3, entry 16):**

Colorless oil

**$^1\text{H NMR}$**  (300 MHz,  $\text{CDCl}_3$ , TMS):  $\delta = 9.15$  (s, 2H),  $8.74$  (s, 4H).

**$^{13}\text{C NMR}$**  (75 MHz,  $\text{CDCl}_3$ , TMS):  $\delta = 158.6, 157.7, 129.8$ .

**Mass** (EI):  $m/z$  190 $[\text{M}]^+$

**Anal. calcd for:** ( $\text{C}_8\text{H}_6\text{N}_4\text{S}$ ) C, 50.51; H, 3.18; S, 16.86.

**Found:** C, 50.49; H, 3.17; S, 16.85.

## References

(1) Ke, F.; Qu, Y.; Jiang, Z.; Li, Z.; Wu, D.; Zhou, X.; *Org. Lett.*, 2011, *13*, 454–457. DOI: 10.1021/ol102784c.

**Copies of  $^1\text{H}$  NMR and  $^{13}\text{C}$  NMR of compounds:**

**Diphenylsulfane (Table 3, entry 1):**

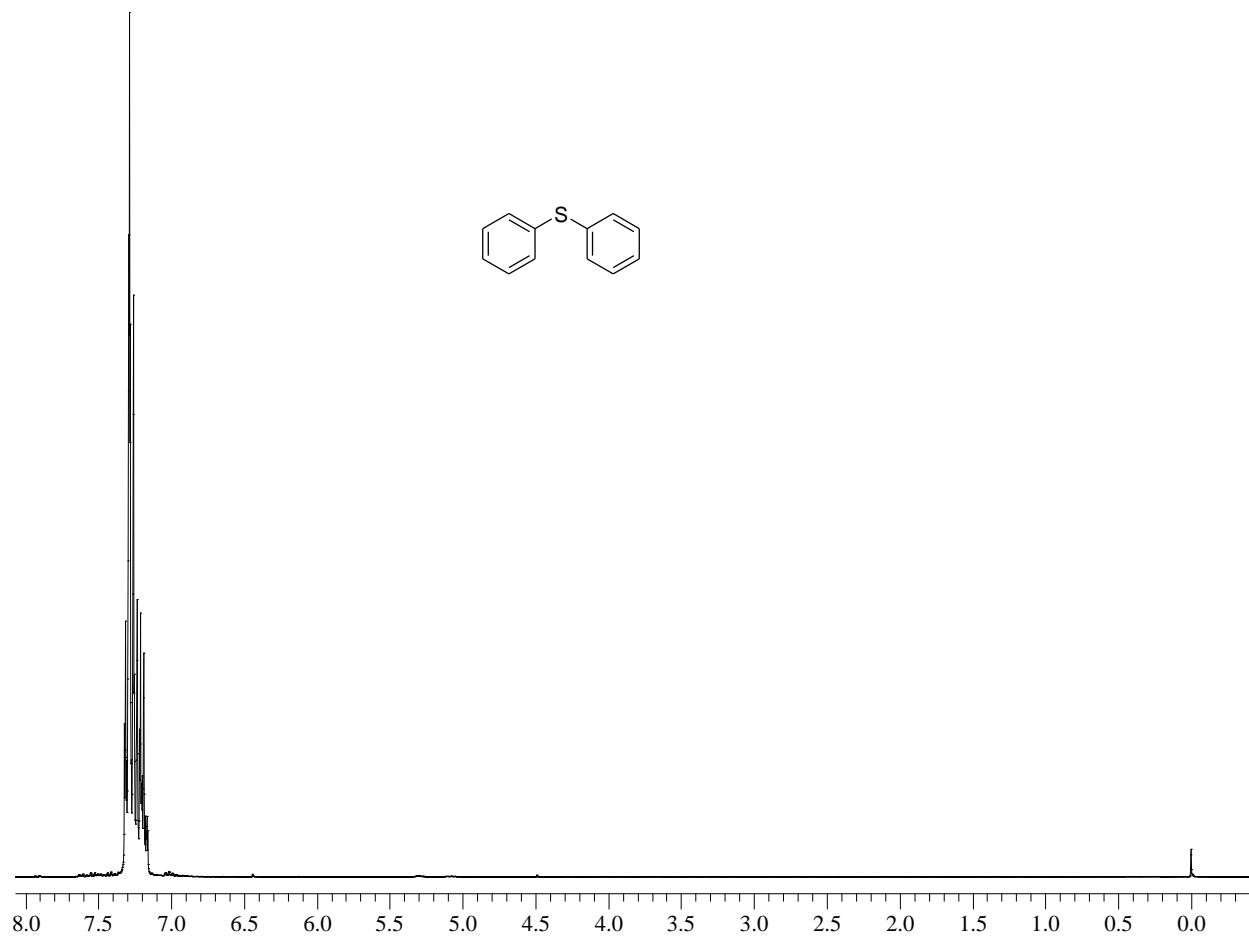



**Di-*p*-tolylsulfane (Table 3, entry 3):**

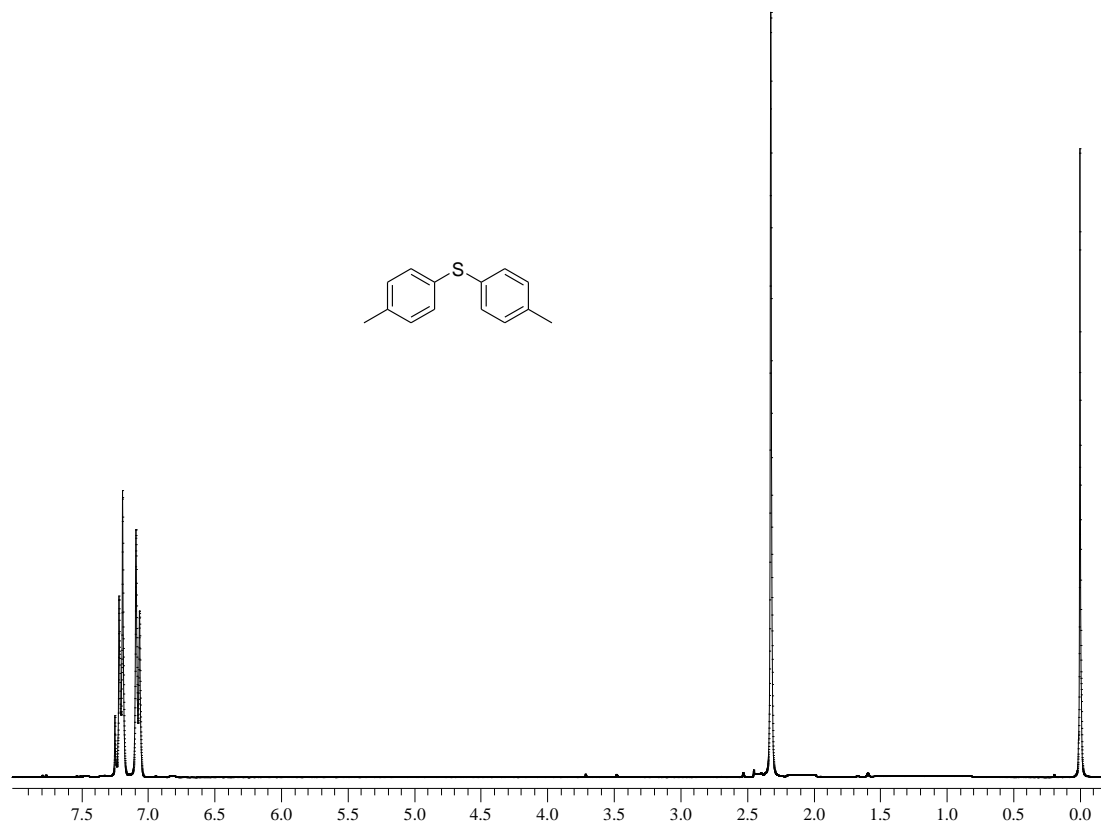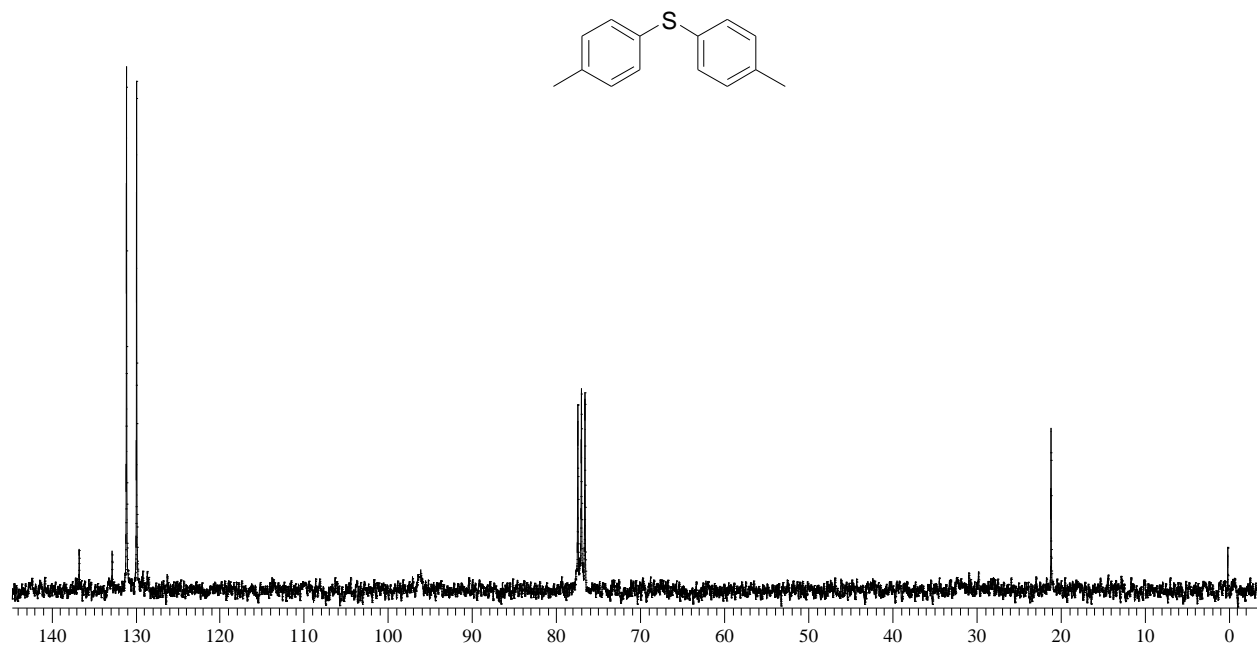

**Bis(4-methoxyphenyl)sulfane (Table 3, entry 6):**

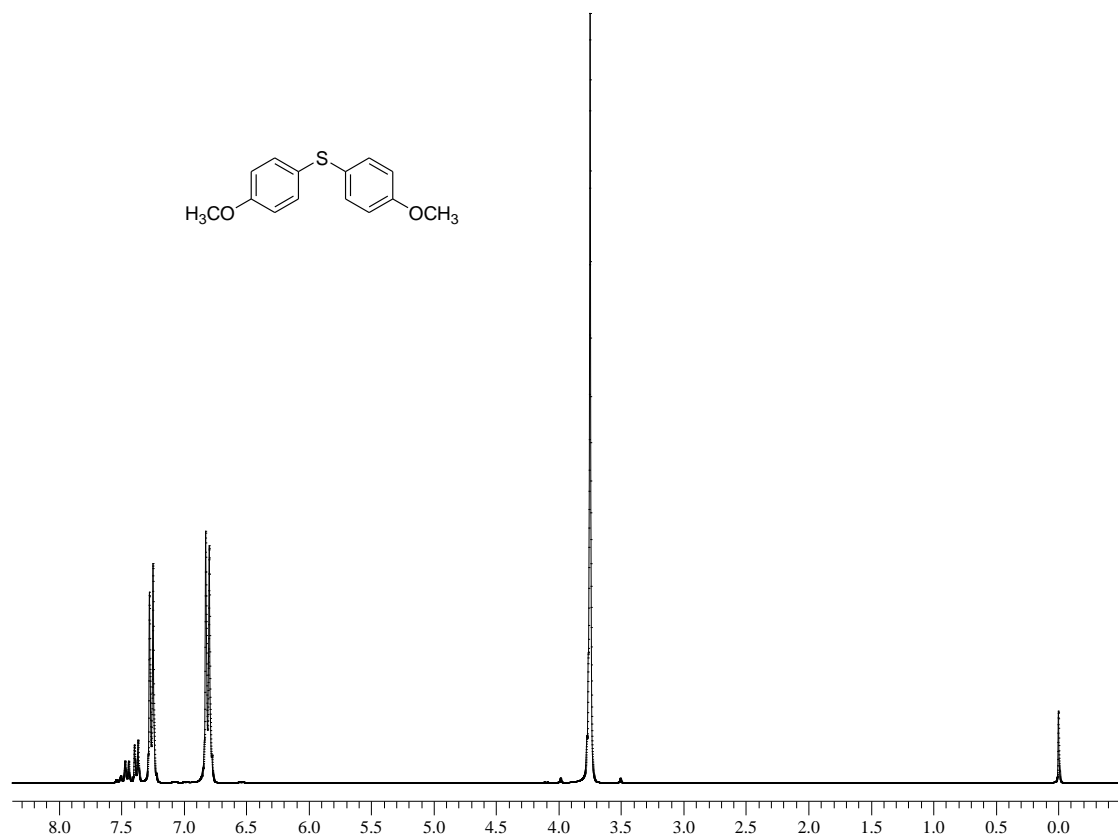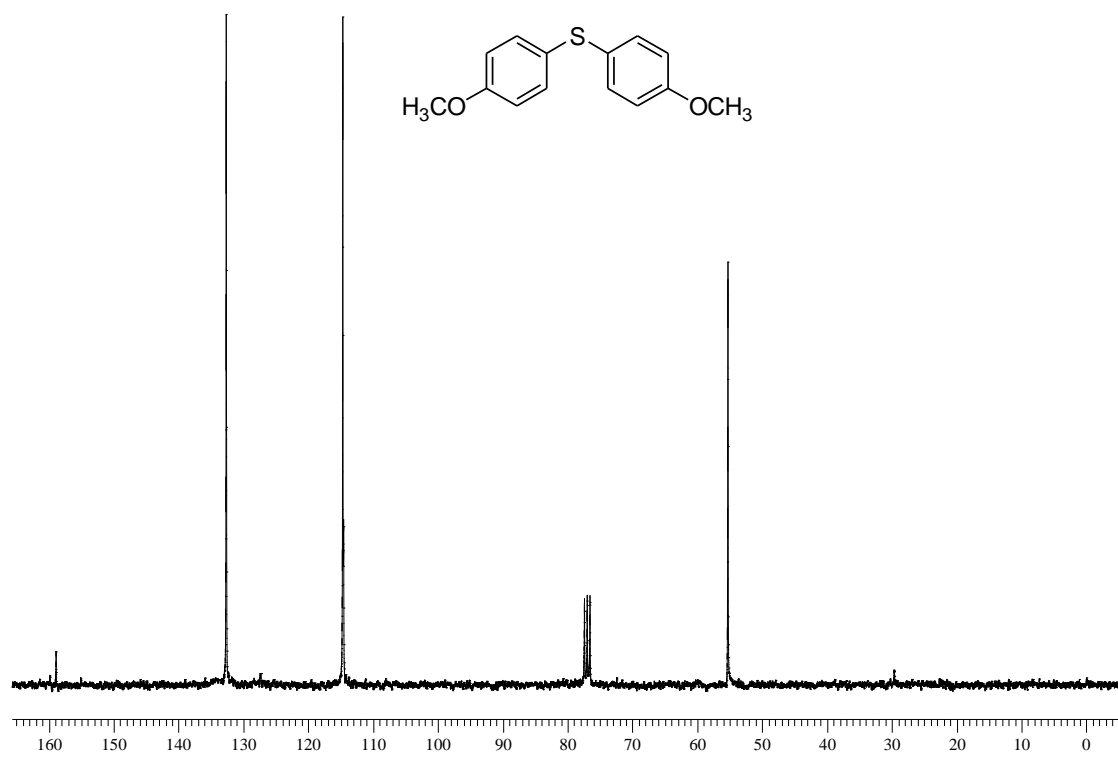

**Bis(4-ethylphenyl)sulfane (Table 3, entry 8):**

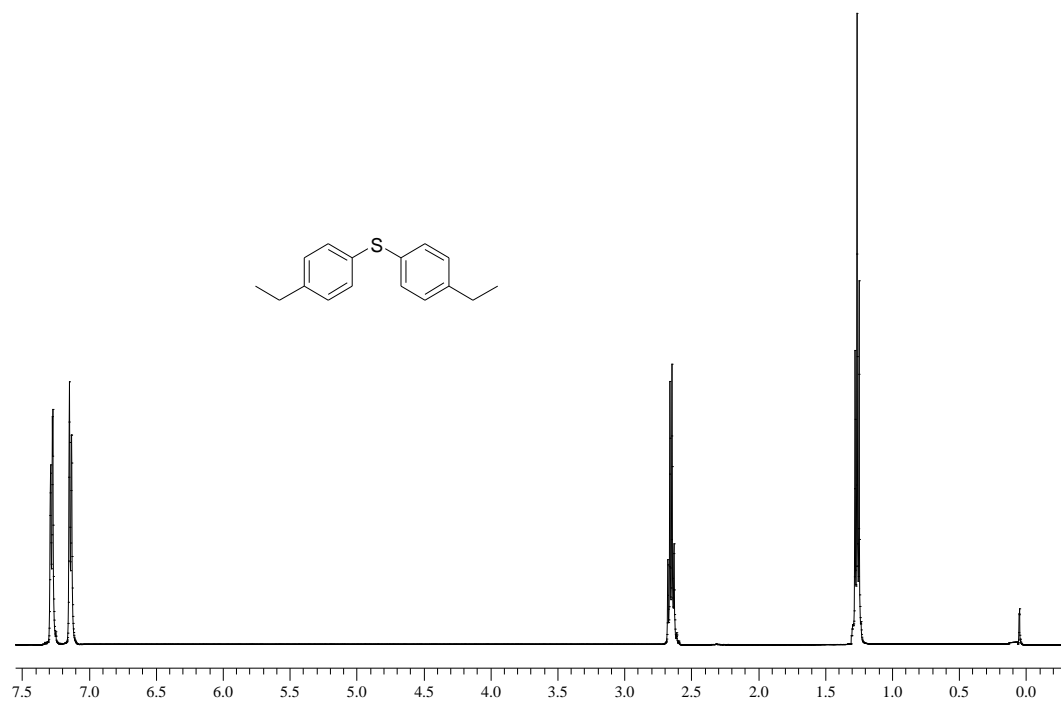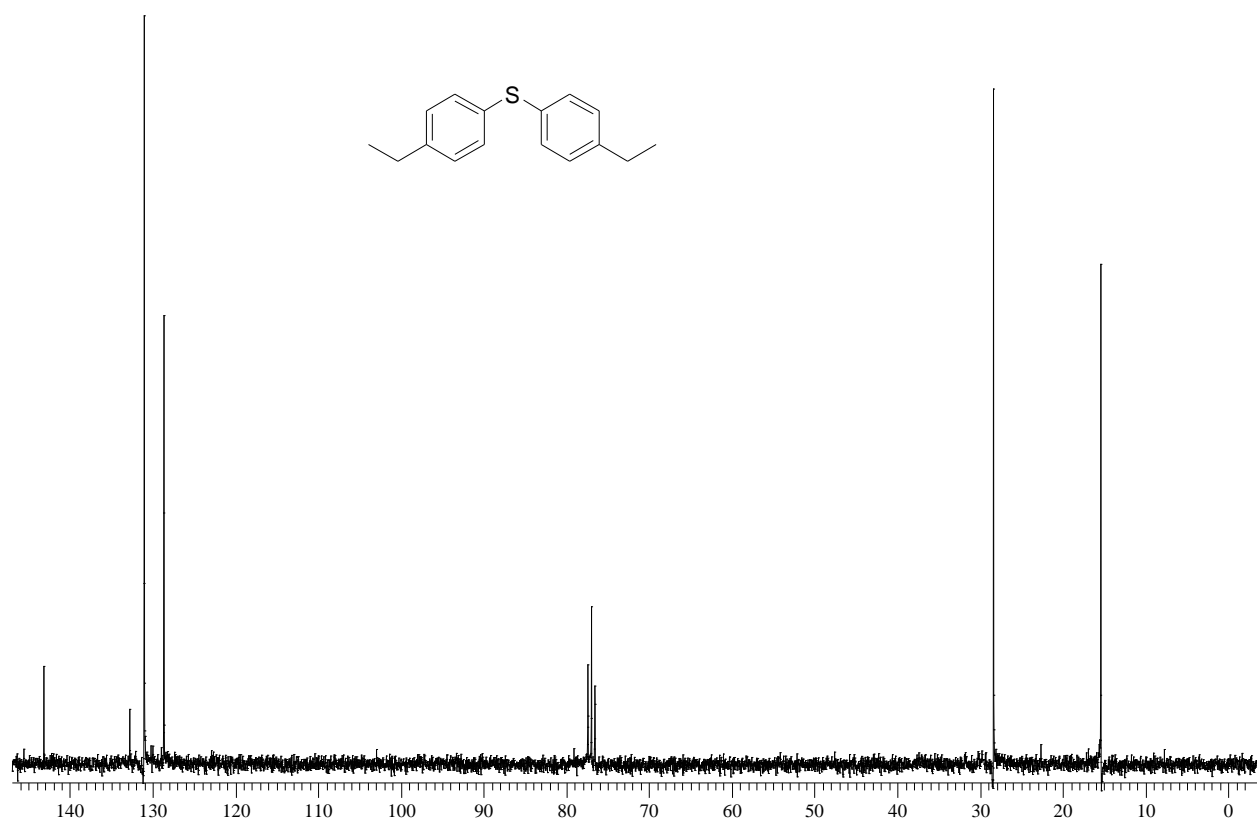

**Bis(4-fluorophenyl)sulfane (Table 3, entry 9):**

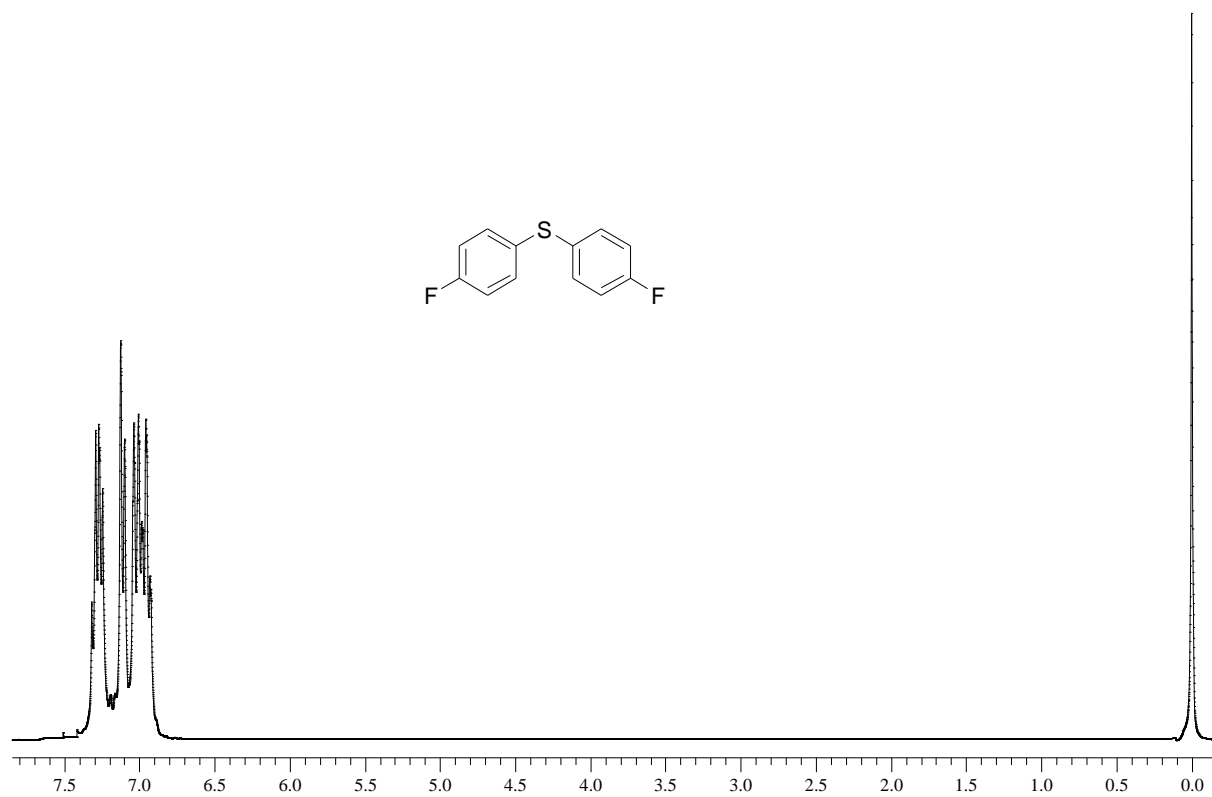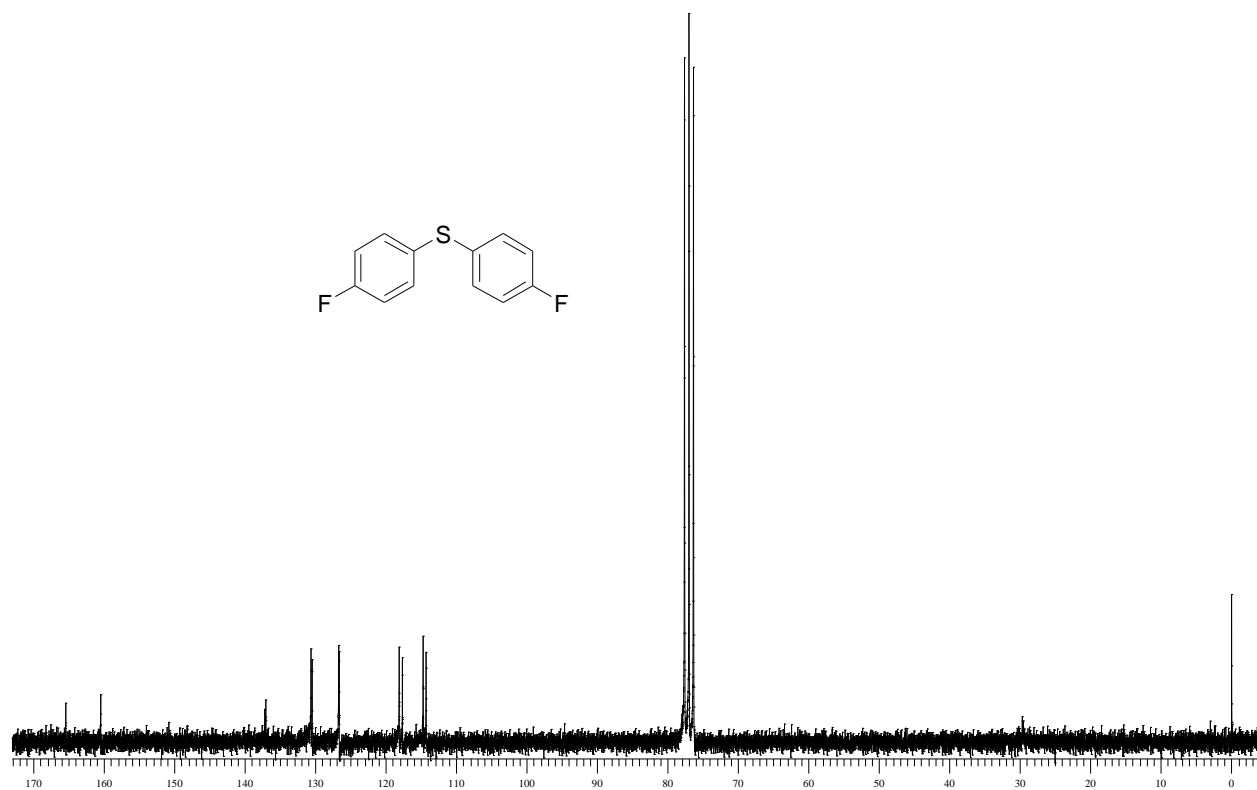

**Bis(4-(trifluoromethyl)phenyl)sulfane (Table 3, entry 10):**

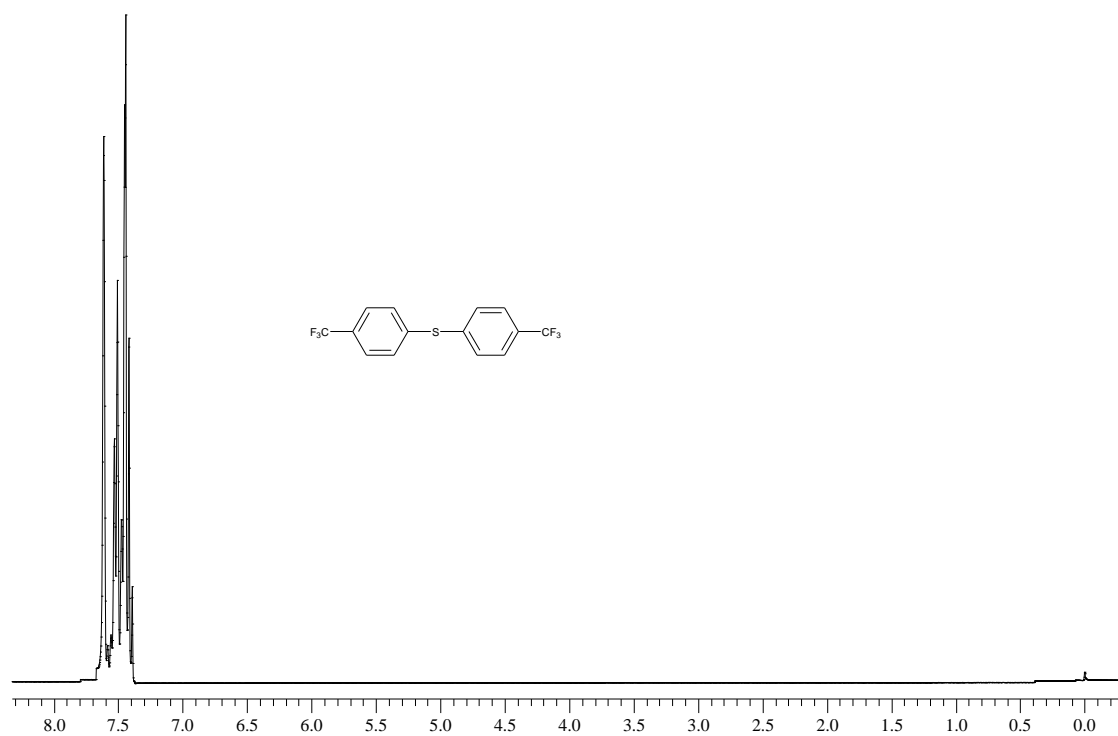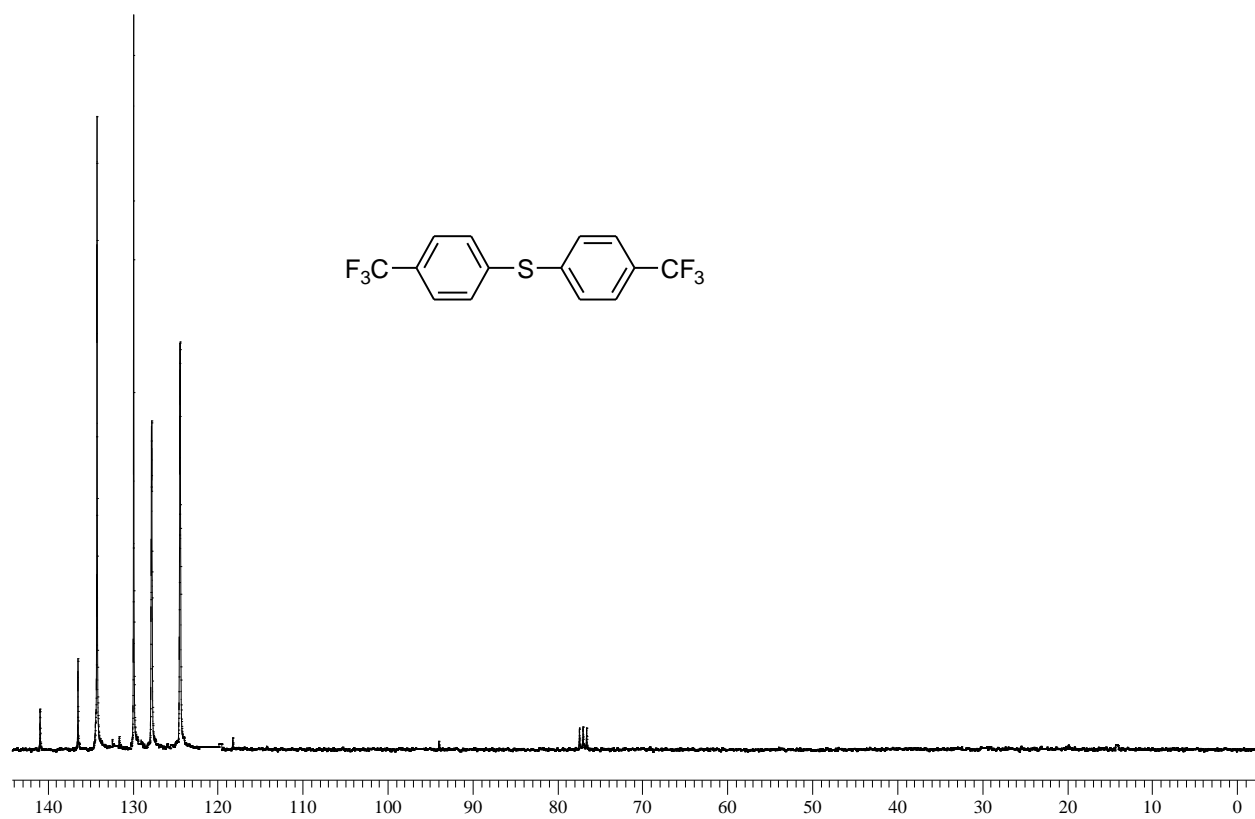

**Bis(3-nitrophenyl)sulfane (Table 3, entry 11 ):**

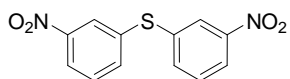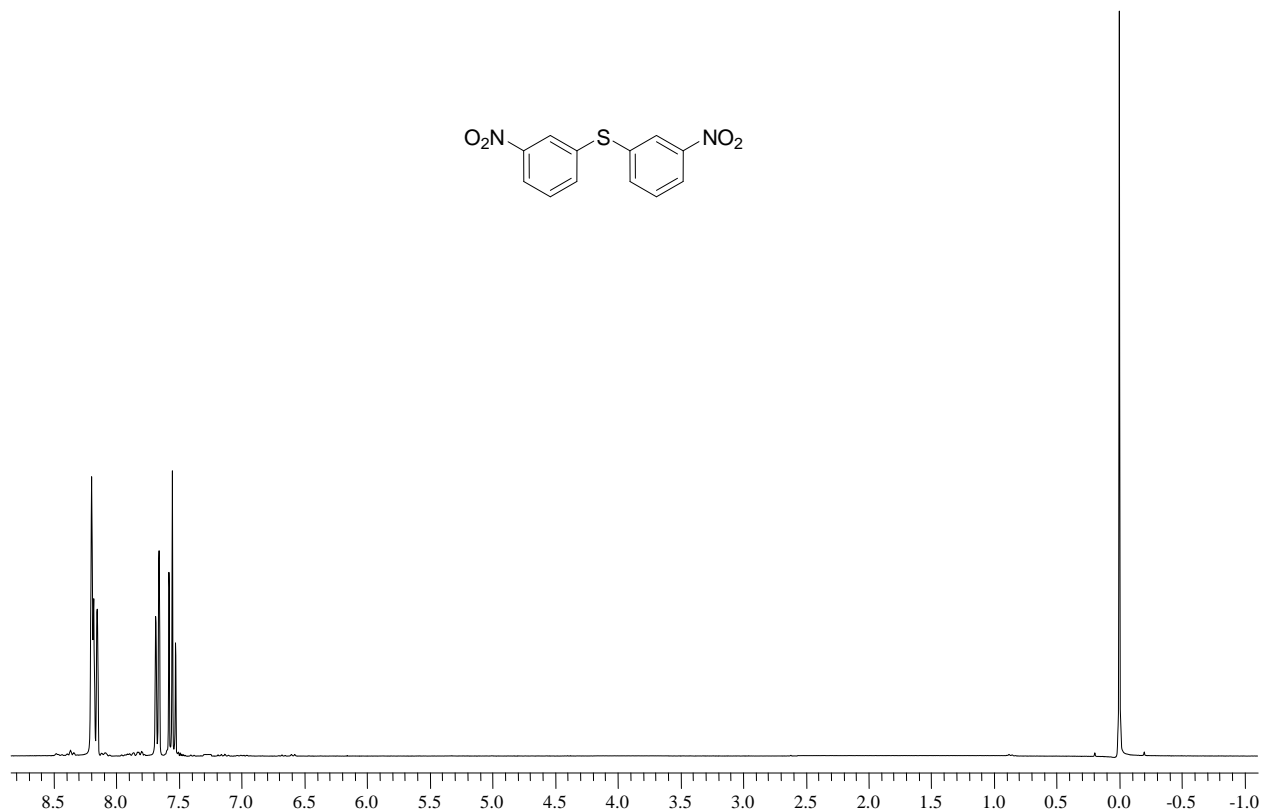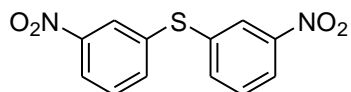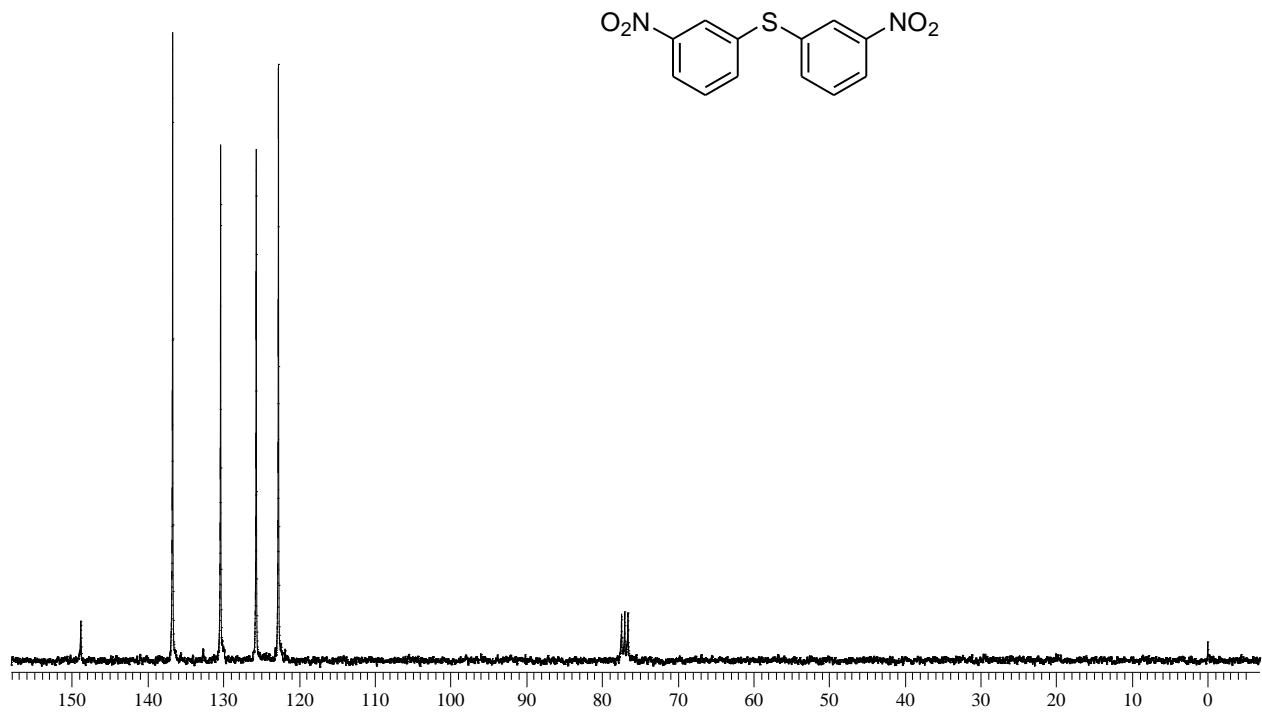

**Bis(3-hydroxyphenyl)sulfane (Table 3, entry 12):**

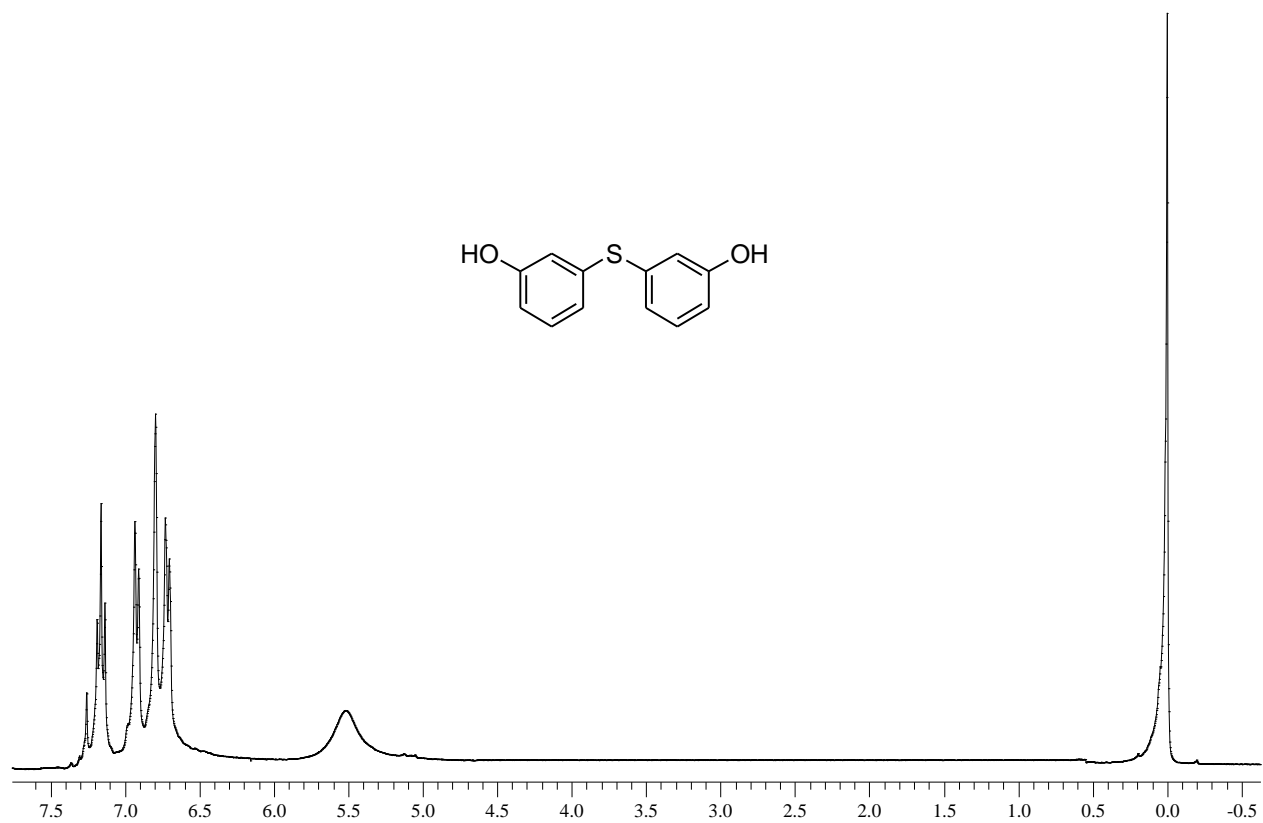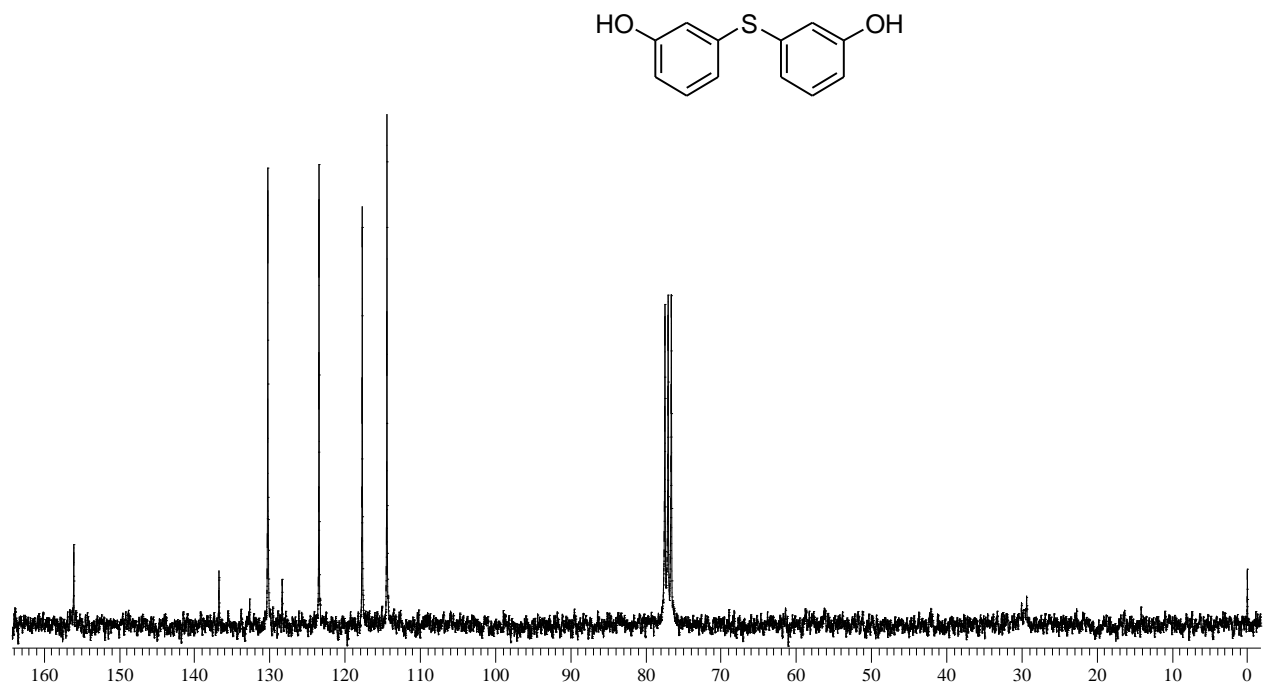

**Dithiophen-2-ylsulfane (Table 3, entry 13):**

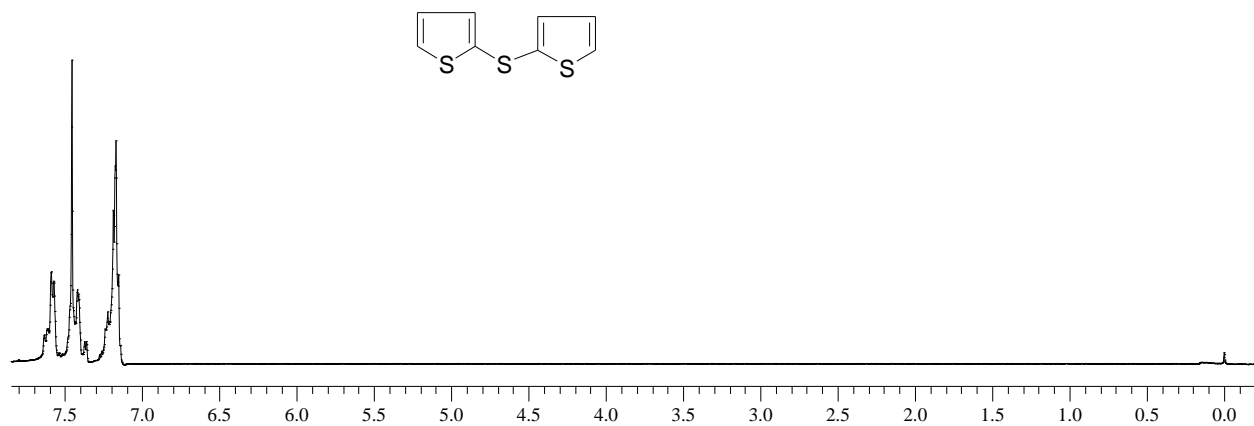

**Dithiophen-3-ylsulfane (Table 3, entry 14)**

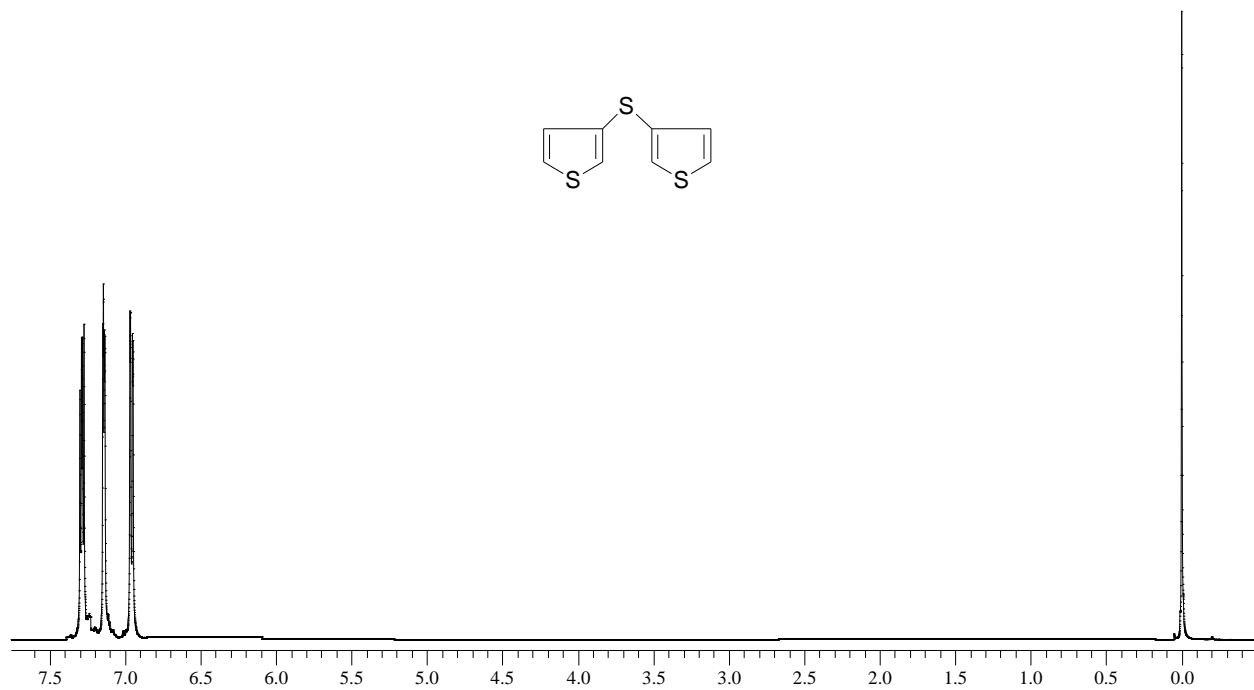



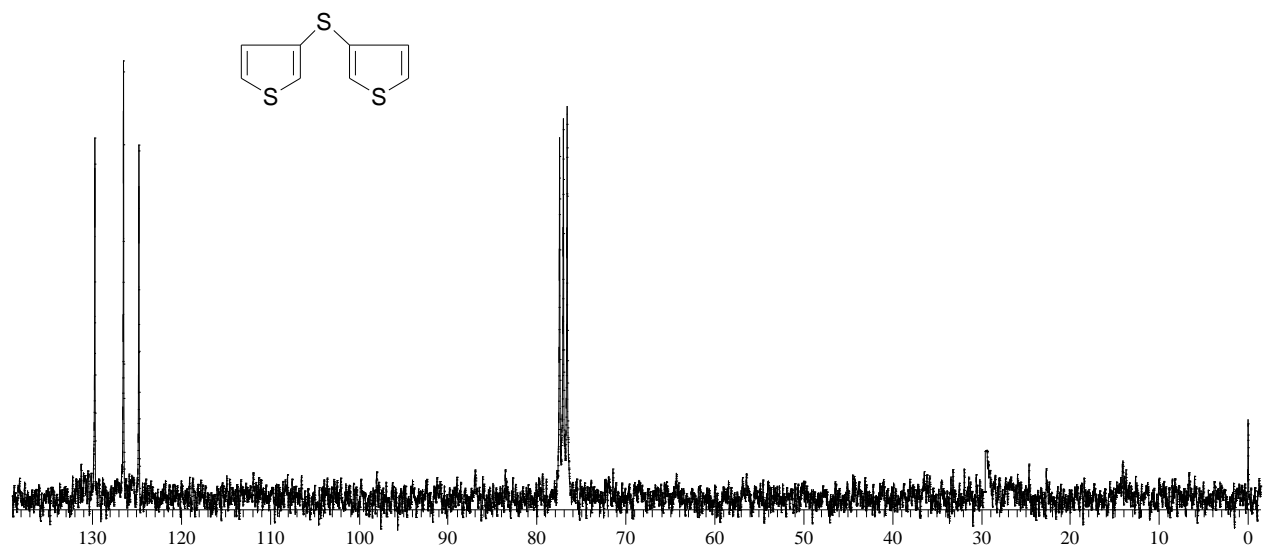

**Dipyrazin-2-ylsulfane (Table 3, entry 15):**

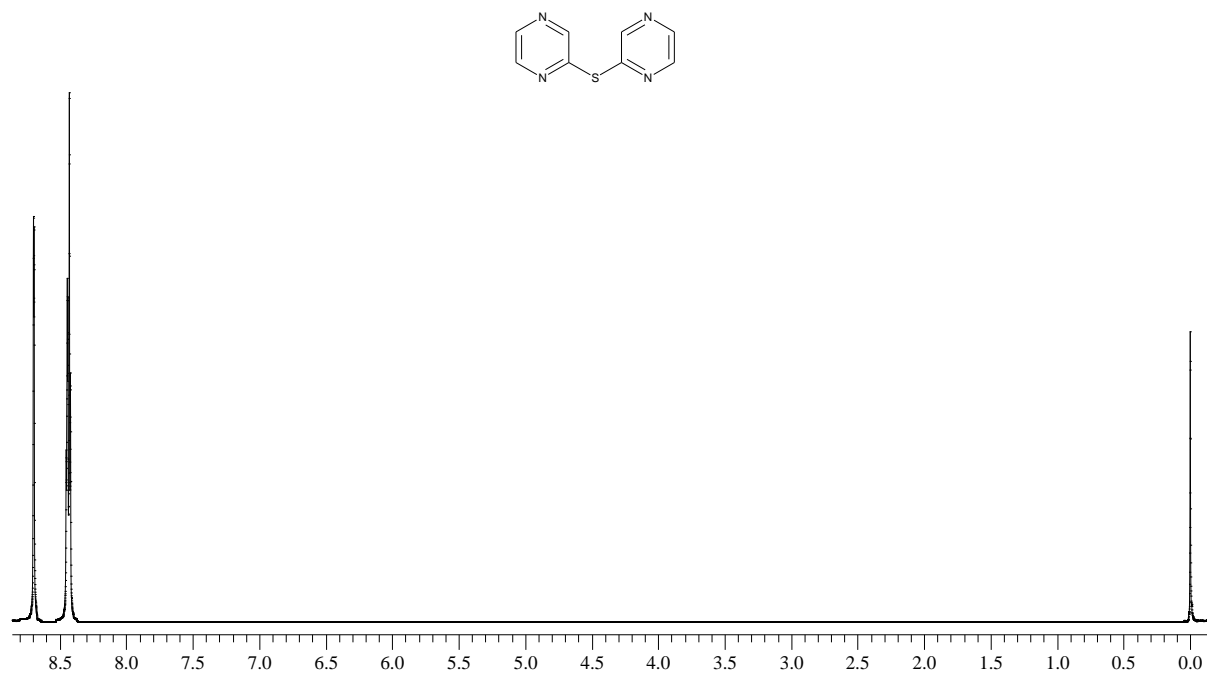

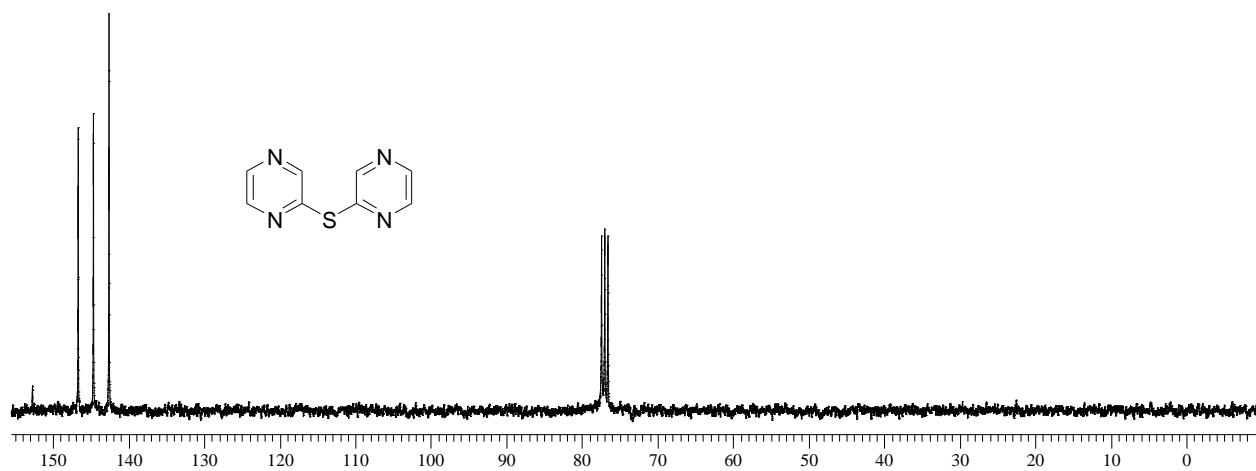

**Dipyrimidin-5-ylsulfane (Table 3, entry 16):**

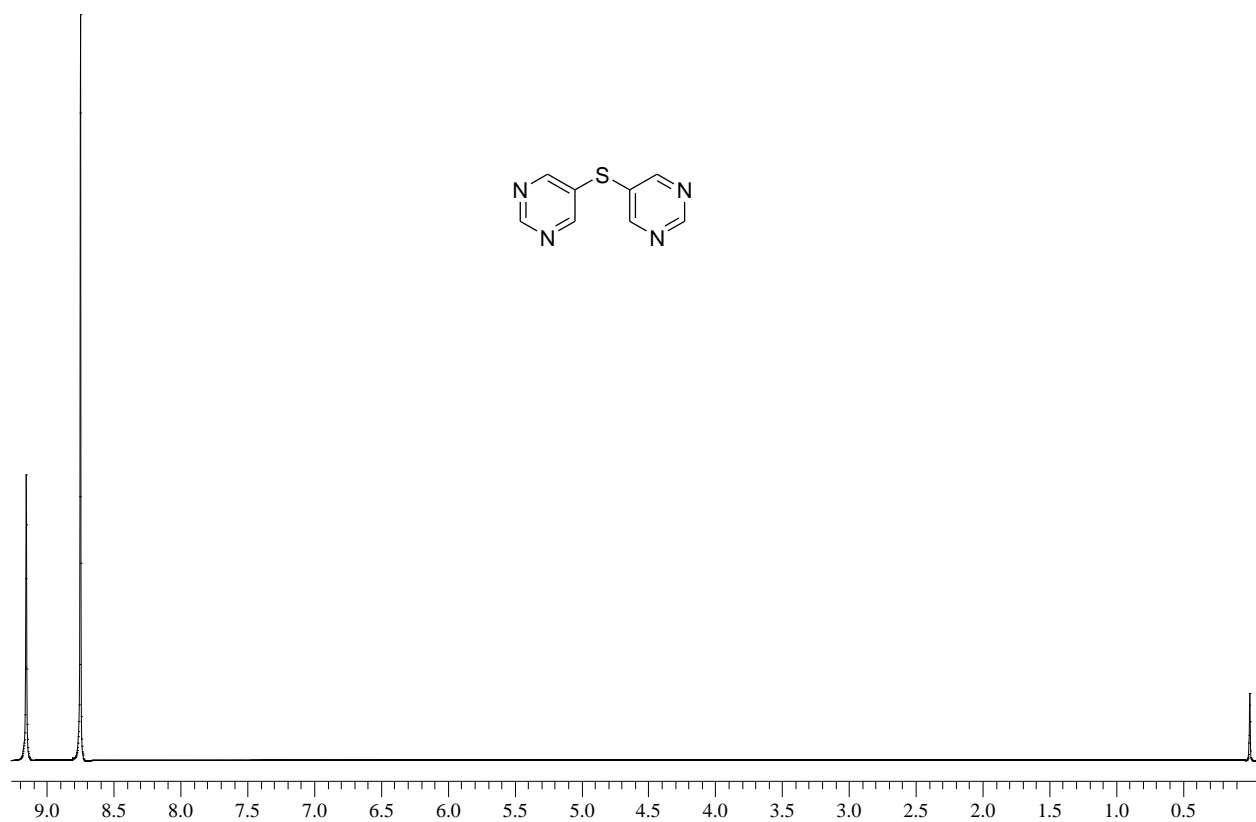

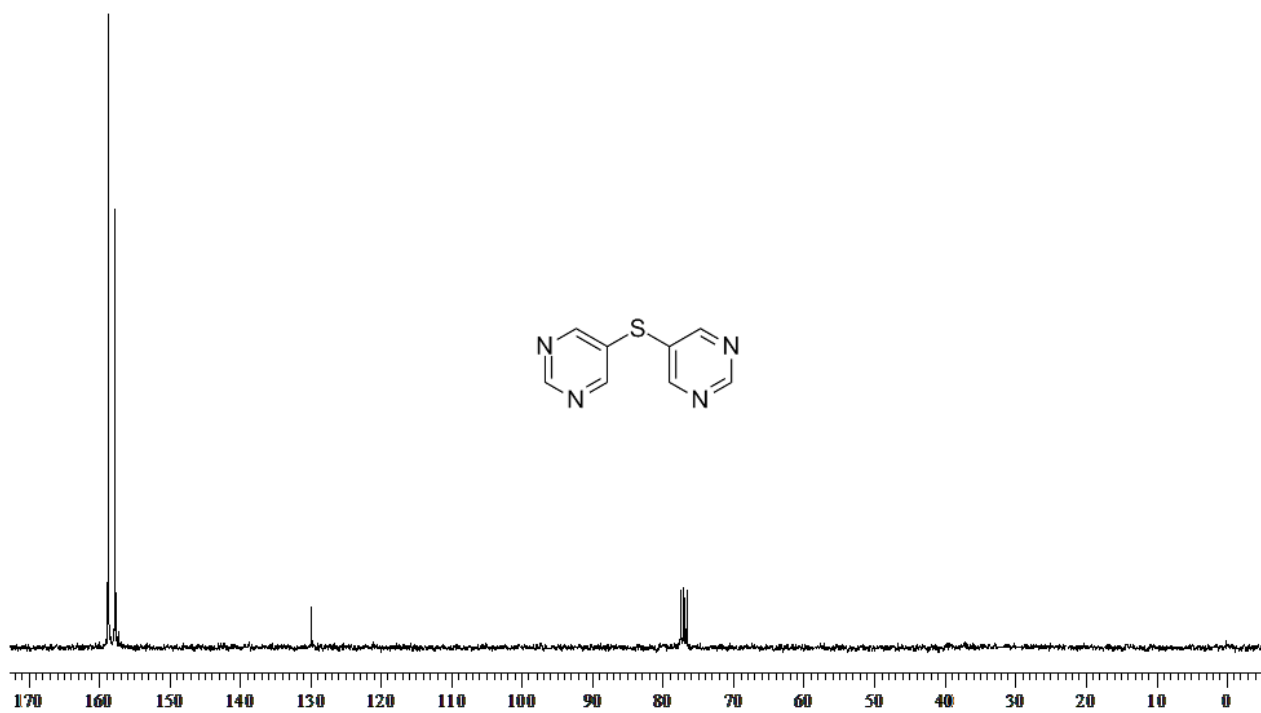

Supplement: Additional file 1 [file 1860-5397-7-101-S1.pdf]
